# Supplementary material for: “Old” chemistry in a new context: photocleavable 2-oxoacetate-containing latex dispersions and core–shell microcapsules for the controlled release of volatile compounds
Source: Royal Society of Chemistry journal article supplement (doi:10.1039/c5py00162e), 2015-01-01

Polymer Chemistry

*Electronic Supplementary Information (ESI)*

**“Old” chemistry in a new context: photocleavable 2-oxoacetate-containing latex  
dispersions and core-shell microcapsules for the controlled release of volatile  
compounds**

Marine Charlon, Alain Trachsel, Nicolas Paret, Laurence Frascotti,

Damien L. Berthier,\* and Andreas Herrmann\*

---

*Firmenich SA, Materials Science, Corporate R&D Division, Route des Jeunes 1,  
B.P. 239, CH-1211 Genève 8, Switzerland.*

*E-mail: damien.berthier@firmenich.com; andreas.herrmann@firmenich.com*

**Table S1.** Amount of citral extracted from an emulsion of SDS in water containing profragrance **1**, latex nanoparticles **7** and microcapsules **A@1** to **D@1** after 3, 5.5 and 8 h of irradiation at 90'000 lux. Numerical data for the results depicted in Fig. 3a.

| Sample     | <i>(E)</i> - and <i>(Z)</i> -Citral released after irradiation for |         |                                |                              |
|------------|--------------------------------------------------------------------|---------|--------------------------------|------------------------------|
|            | 3 h [ng $\mu\text{L}^{-1}$ ]                                       | 3 h [%] | 5.5 h [ng $\mu\text{L}^{-1}$ ] | 8 h [ng $\mu\text{L}^{-1}$ ] |
| <b>1</b>   | 14.7                                                               | 1.2     | 9.5                            | 6.0                          |
| <b>7</b>   | 27.7                                                               | 2.3     | 18.7                           | 10.2                         |
| <b>A@1</b> | 8.4                                                                | 0.7     | 6.7                            | 3.0                          |
| <b>B@1</b> | 6.5                                                                | 0.5     | 7.6                            | n.d.                         |
| <b>C@1</b> | 10.0                                                               | 0.8     | 7.6                            | 5.7                          |
| <b>D@1</b> | 12.5                                                               | 1.0     | 8.6                            | 6.2                          |

**Table S2.** Amount of 2-phenylacetaldehyde and *(Z)*-hex-3-enal extracted from an emulsion of SDS in water containing the corresponding profragrances, latex nanoparticles or microcapsules after 2 h of irradiation at 90'000 lux in the presence or absence of an organic layer. Numerical data for the results depicted in Fig. 4.

| Sample     | 2-Phenylacetaldehyde released after irradiation for 2 h                |                         |                                              |
|------------|------------------------------------------------------------------------|-------------------------|----------------------------------------------|
|            | with organic layer (continuous extraction)<br>[ng $\mu\text{L}^{-1}$ ] | no organic layer<br>[%] | no organic layer<br>[ng $\mu\text{L}^{-1}$ ] |
| <b>2</b>   | 141.1                                                                  | 14.7                    | 67.5                                         |
| <b>8</b>   | 156.0                                                                  | 16.2                    | n.d.                                         |
| <b>A@2</b> | 39.7                                                                   | 4.1                     | n.d.                                         |
| <b>C@2</b> | 61.0                                                                   | 6.3                     | n.d.                                         |
| <b>D@2</b> | 95.0                                                                   | 9.9                     | 79.2                                         |

| Sample     | <i>(Z)</i> -Hex-3-enal released after irradiation for 2 h              |                         |                                              |
|------------|------------------------------------------------------------------------|-------------------------|----------------------------------------------|
|            | with organic layer (continuous extraction)<br>[ng $\mu\text{L}^{-1}$ ] | no organic layer<br>[%] | no organic layer<br>[ng $\mu\text{L}^{-1}$ ] |
| <b>3</b>   | 65.1                                                                   | 8.3                     | 10.6                                         |
| <b>9</b>   | 96.5                                                                   | 12.3                    | n.d.                                         |
| <b>A@3</b> | 7.7                                                                    | 1.0                     | n.d.                                         |
| <b>C@3</b> | 15.4                                                                   | 2.0                     | n.d.                                         |
| <b>D@3</b> | 35.1                                                                   | 4.5                     | 14.6                                         |

**Table S3.** Dynamic headspace concentrations (and standard deviations in parentheses) for the release of fragrance aldehydes from profragrances **1–3**, microcapsules of type **A–D**, latex nanoparticles **7–9** and the unmodified fragrance as the reference on cotton after photoirradiation with a xenon lamp. Numerical data for the results depicted in Fig. 5.

| Time [min] | <i>(E)</i> - and <i>(Z)</i> -Citral released from [ng L <sup>-1</sup> ] |                   |                 |                  |                  |                  |                   |
|------------|-------------------------------------------------------------------------|-------------------|-----------------|------------------|------------------|------------------|-------------------|
|            | Reference                                                               | <b>1</b>          | <b>7</b>        | <b>A@1</b>       | <b>B@1</b>       | <b>C@1</b>       | <b>D@1</b>        |
| 10         | 16.1<br>(±1.4)                                                          | 124.5<br>(±97.2)  | 32.0<br>(±3.2)  | 78.4<br>(±4.4)   | 51.4<br>(±18.7)  | 61.8<br>(±2.0)   | 149.5<br>(±60.7)  |
| 25         | 16.0<br>(±0.7)                                                          | 212.0<br>(±117.0) | 41.2<br>(±14.0) | 149.1<br>(±27.9) | 94.3<br>(±47.0)  | 147.5<br>(±29.3) | 250.3<br>(±101.2) |
| 55         | 17.6<br>(±6.1)                                                          | 228.5<br>(±93.7)  | 32.9<br>(±10.9) | 152.3<br>(±16.4) | 102.9<br>(±16.7) | 153.9<br>(±33.1) | 182.7<br>(±75.3)  |
| 85         | 16.3<br>(±0.6)                                                          | 154.9<br>(±62.5)  | 20.2<br>(±3.5)  | 86.2<br>(±4.0)   | 76.5<br>(±11.4)  | 101.1<br>(±20.5) | 113.5<br>(±64.2)  |
| 115        | 16.4<br>(±0.6)                                                          | 104.8<br>(±60.9)  | 16.6<br>(±0.1)  | 49.6<br>(±9.2)   | 57.8<br>(±18.5)  | 66.8<br>(±3.4)   | 65.9<br>(±41.3)   |
| 145        | 16.1<br>(±0.4)                                                          |                   |                 | 33.7<br>(±2.5)   | 43.2<br>(±9.5)   | 39.1             | 50.2<br>(±24.5)   |

  

| Time [min] | 2-Phenylacetaldehyde released from [ng L <sup>-1</sup> ] |                 |                   |                 |                  |                  |
|------------|----------------------------------------------------------|-----------------|-------------------|-----------------|------------------|------------------|
|            | Reference                                                | <b>2</b>        | <b>8</b>          | <b>A@2</b>      | <b>C@2</b>       | <b>D@2</b>       |
| 10         | 1.3<br>(±2.7)                                            | 51.2<br>(±20.5) | 781.9<br>(±420.8) | 55.7<br>(±10.6) | 105.9<br>(±20.3) | 339.8<br>(±29.3) |
| 25         | 2.1<br>(±3.9)                                            | 62.4<br>(±22.1) | 675.5<br>(±331.5) | 59.8<br>(±11.4) | 113.7<br>(±18.3) | 297.1<br>(±44.5) |
| 55         | 5.2<br>(±9.0)                                            | 39.4<br>(±14.4) | 368.6<br>(±142.3) | 36.2<br>(±12.3) | 69.8<br>(±11.9)  | 160.6<br>(±11.0) |
| 85         | 6.2<br>(±8.8)                                            | 25.7<br>(±11.2) | 193.1<br>(±53.5)  | 18.3<br>(±5.8)  | 42.6<br>(±8.7)   | 93.7<br>(±2.6)   |
| 115        | 8.7<br>(±13.4)                                           | 16.4<br>(±6.1)  | 111.9<br>(±27.8)  | 13.2<br>(±6.0)  | 26.9<br>(±5.4)   | 72.4<br>(±11.0)  |
| 145        | 9.4<br>(±10.3)                                           | 11.2<br>(±6.2)  | 66.5<br>(±8.0)    | ---             | 21.9<br>(±5.2)   | 53.7<br>(±10.0)  |

  

| Time [min] | <i>(Z)</i> -Hex-3-enal released from [ng L <sup>-1</sup> ] |          |                   |                  |                   |                 |
|------------|------------------------------------------------------------|----------|-------------------|------------------|-------------------|-----------------|
|            | Reference                                                  | <b>3</b> | <b>9</b>          | <b>A@3</b>       | <b>C@3</b>        | <b>D@3</b>      |
| 10         | 30.7<br>(±39.4)                                            | 343.5    | 465.4<br>(±120.4) | 341.3<br>(±87.3) | 663.4<br>(±468.2) | 99.9<br>(±5.5)  |
| 25         | 25.6<br>(±20.7)                                            | 140.1    | 157.4<br>(±38.8)  | 134.0<br>(±37.7) | 249.1<br>(±144.7) | 51.9<br>(±15.1) |
| 55         | 21.1<br>(±11.1)                                            | 81.9     | 36.6<br>(±10.2)   | 62.4<br>(±15.5)  | 100.9<br>(±77.0)  | 27.6<br>(±5.6)  |
| 85         | 18.8<br>(±7.8)                                             | 45.6     | 17.3<br>(±2.5)    | 31.5<br>(±9.7)   | 61.0<br>(±28.2)   | 18.2<br>(±2.7)  |
| 115        | 17.9<br>(±6.1)                                             | 343.5    | 13.3<br>(±0.5)    | 20.5<br>(±0.8)   | 34.0<br>(±16.5)   | 14.2<br>(±0.6)  |

**Table S4.** Dynamic headspace concentrations (and standard deviations in parentheses) for the release of 2-phenylacetaldehyde from profragrance **2**, microcapsule **D@2**, latex nanoparticle **8** and the unmodified fragrance as the reference on cotton after exposure to indoor daylight. Numerical data for the results depicted in Fig. 6.

| Time [min] | 2-Phenylacetaldehyde released from [ng L <sup>-1</sup> ] |            |             |            |
|------------|----------------------------------------------------------|------------|-------------|------------|
|            | Reference                                                | <b>2</b>   | <b>8</b>    | <b>D@3</b> |
| 30         | 0.3 (±0.0)                                               | 0.4 (±0.0) | 5.2 (±1.2)  | 3.3 (±3.1) |
| 90         | 0.4 (±0.0)                                               | 0.6 (±0.2) | 10.8 (±3.2) | 5.1 (±3.3) |
| 150        | 0.4 (±0.0)                                               | 0.7 (±0.3) | 13.0 (±4.5) | 5.1 (±2.5) |
| 210        | 0.4 (±0.1)                                               | 0.7 (±0.3) | 14.4 (±4.2) | 4.7 (±1.8) |

Fig. S1  $^1\text{H}$  and  $^{13}\text{C}$  NMR spectra of **4** in  $\text{CDCl}_3$  with TMS as internal standard.

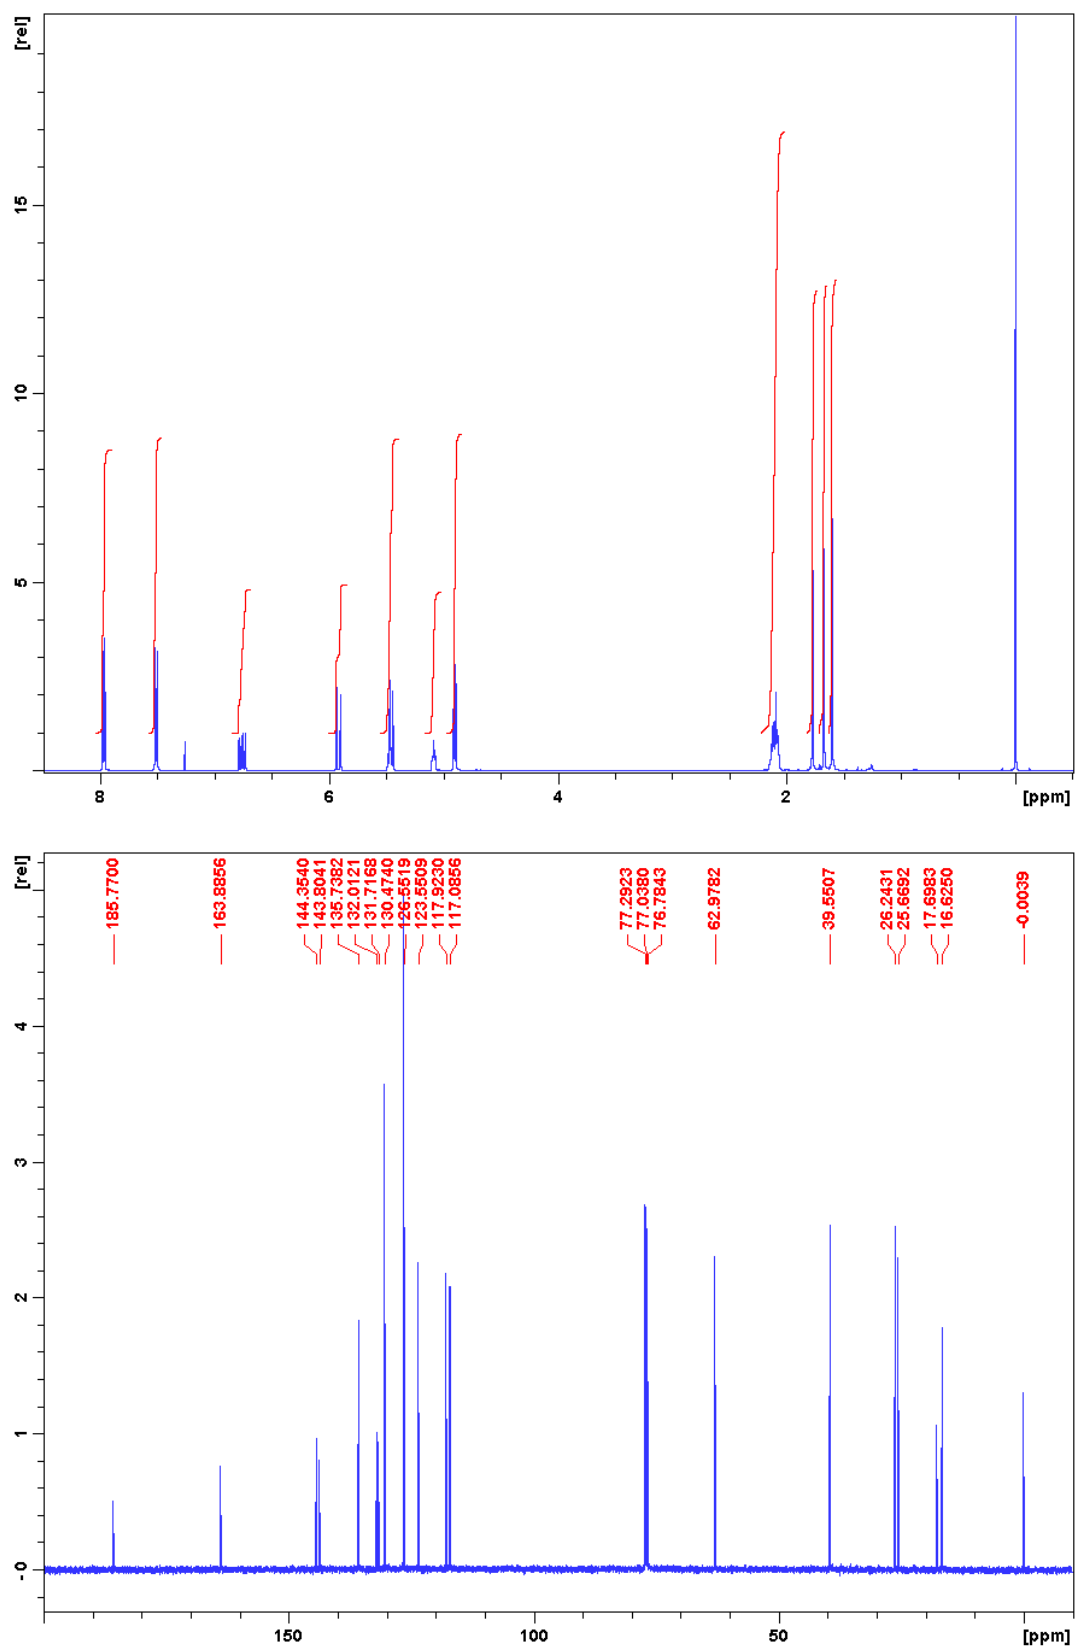

Fig. S2  $^1\text{H}$  and  $^{13}\text{C}$  NMR spectra of **5** in  $\text{CDCl}_3$  with TMS as internal standard.

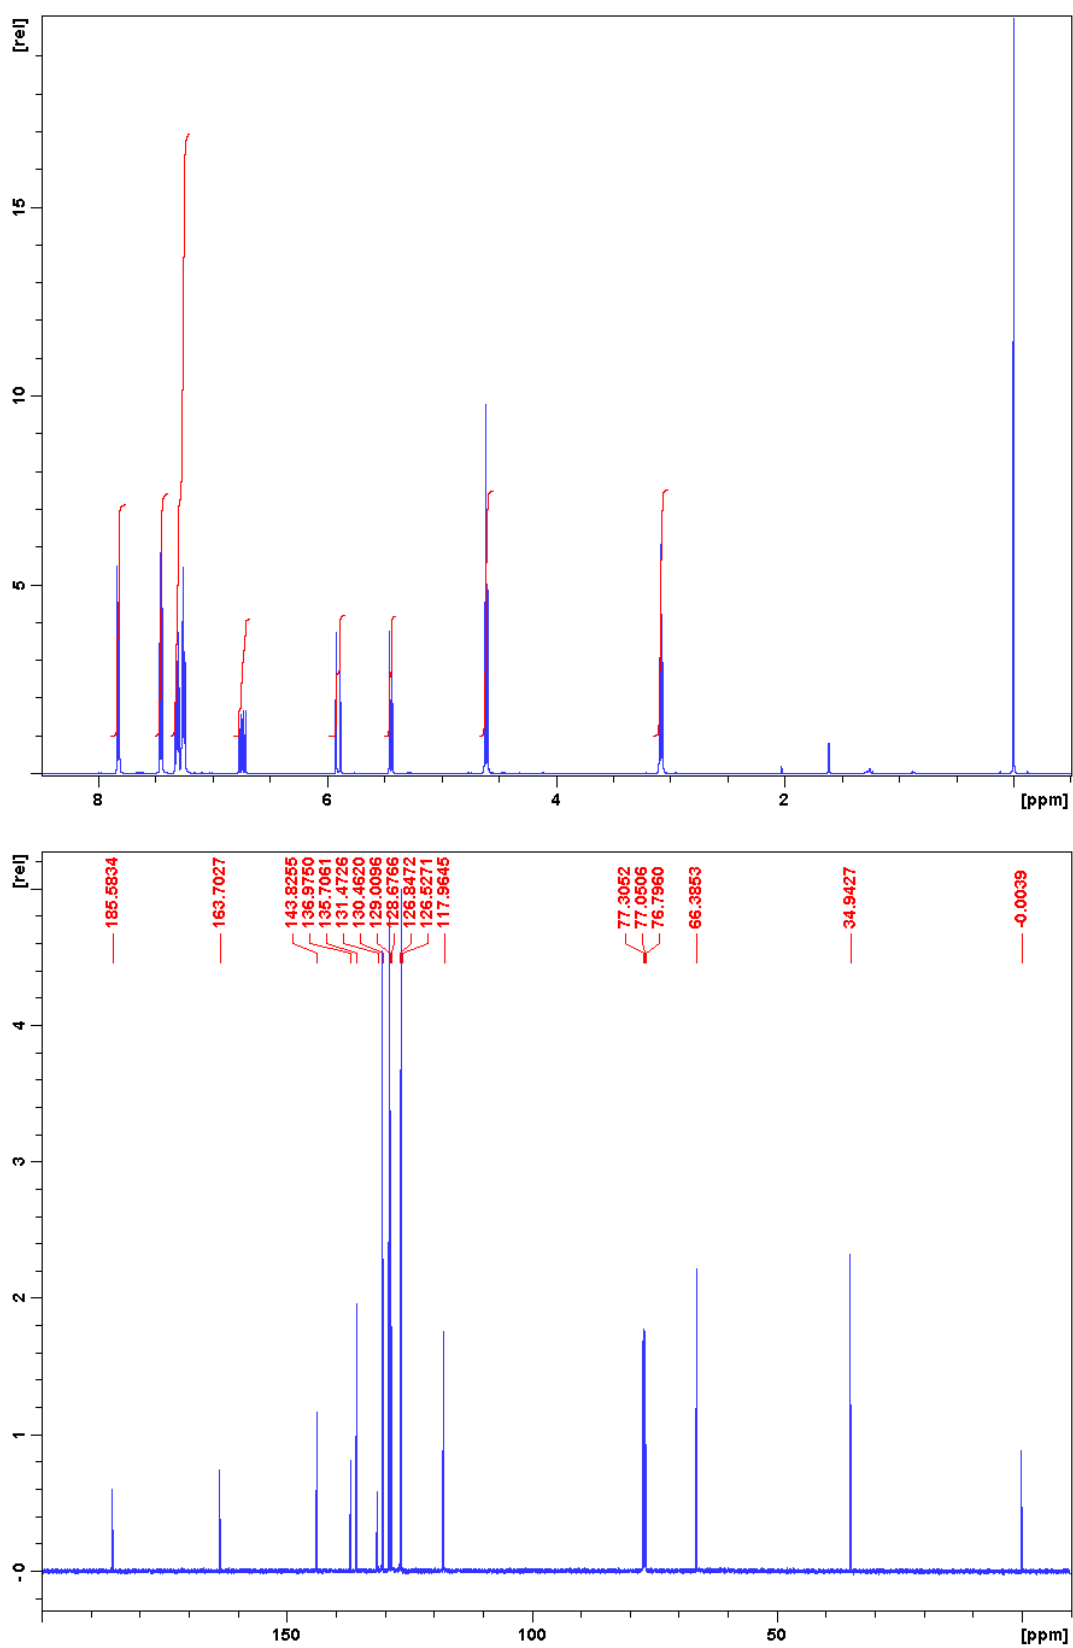

Fig. S3  $^1\text{H}$  and  $^{13}\text{C}$  NMR spectra of **6** in  $\text{CDCl}_3$  with TMS as internal standard.

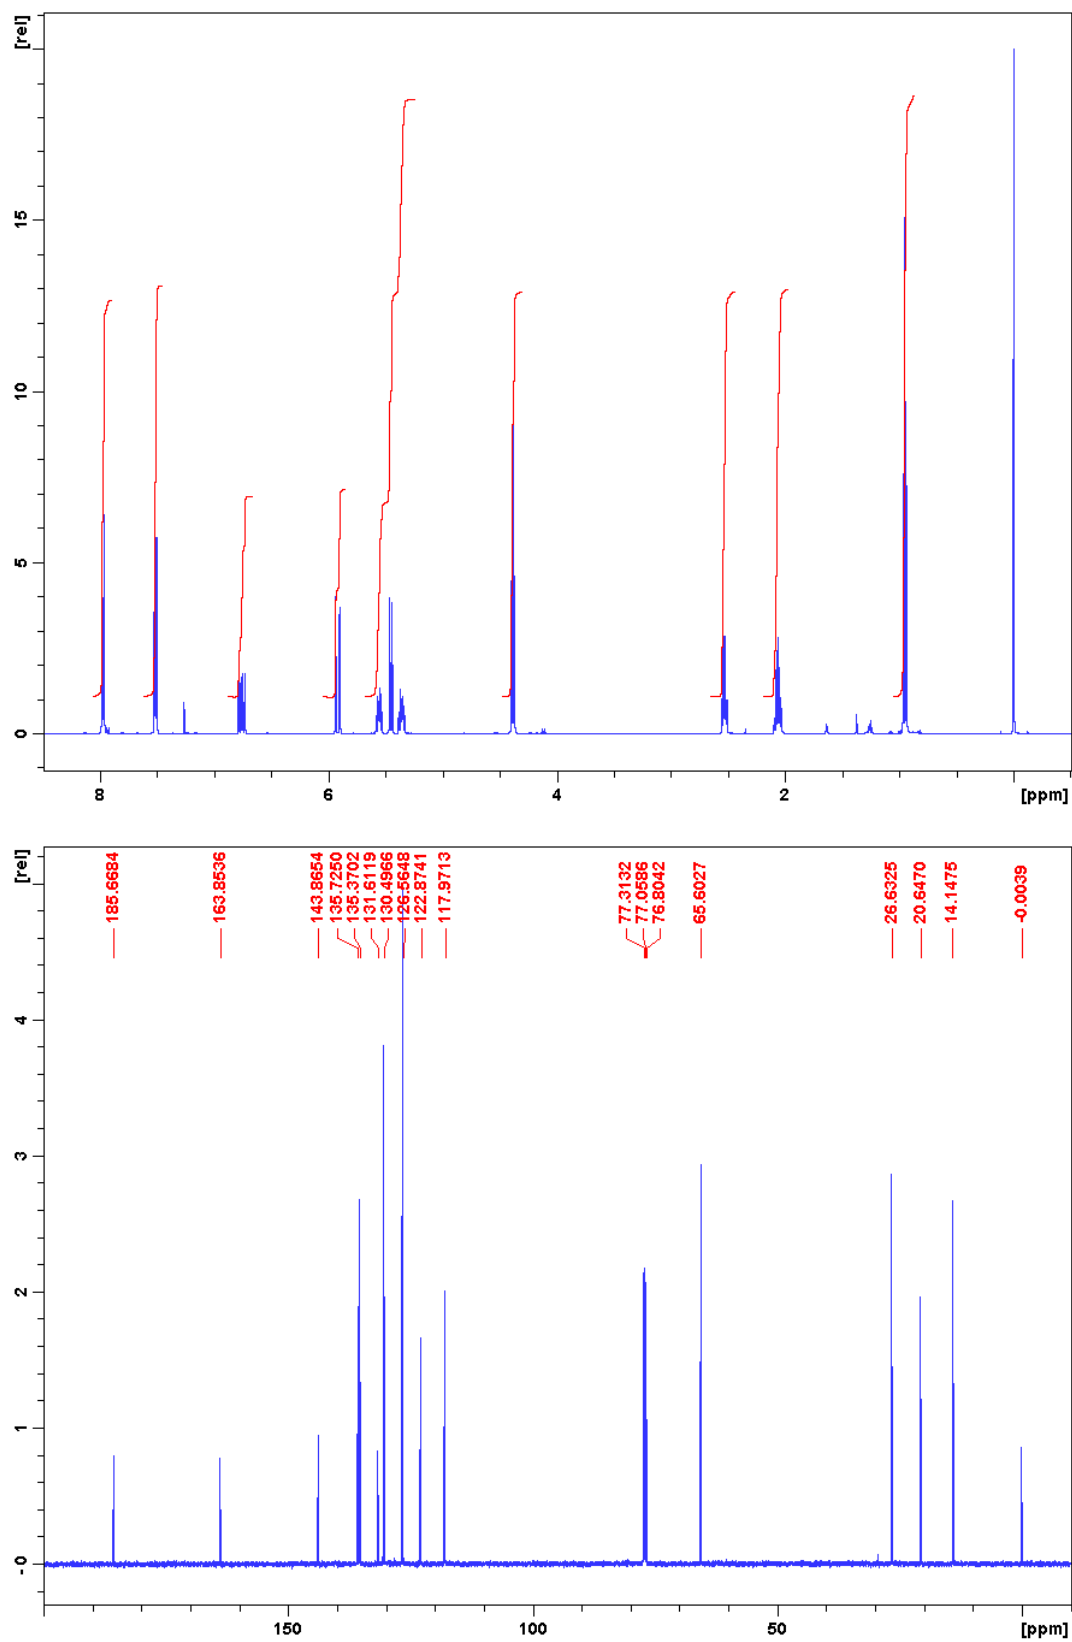

**Fig. S4** Particle size distribution of microcapsules in water determined by FPIA.

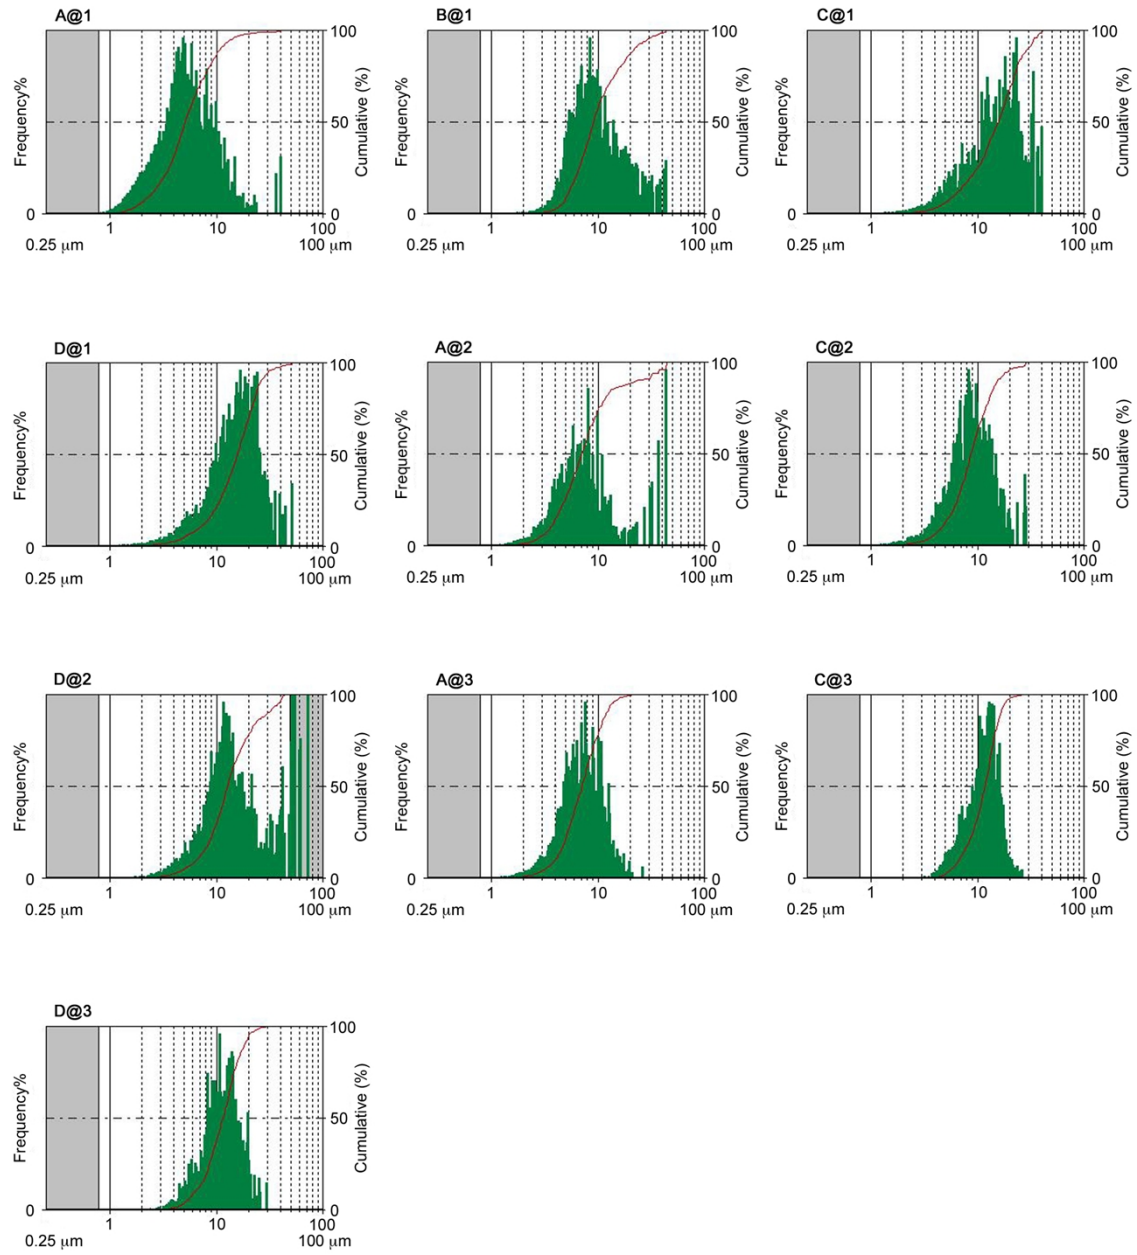



**Fig. S5** Particle size distribution of latex nanoparticles **7** (a), **8** (b) and **9** (c) in water determined by dynamic light scattering.

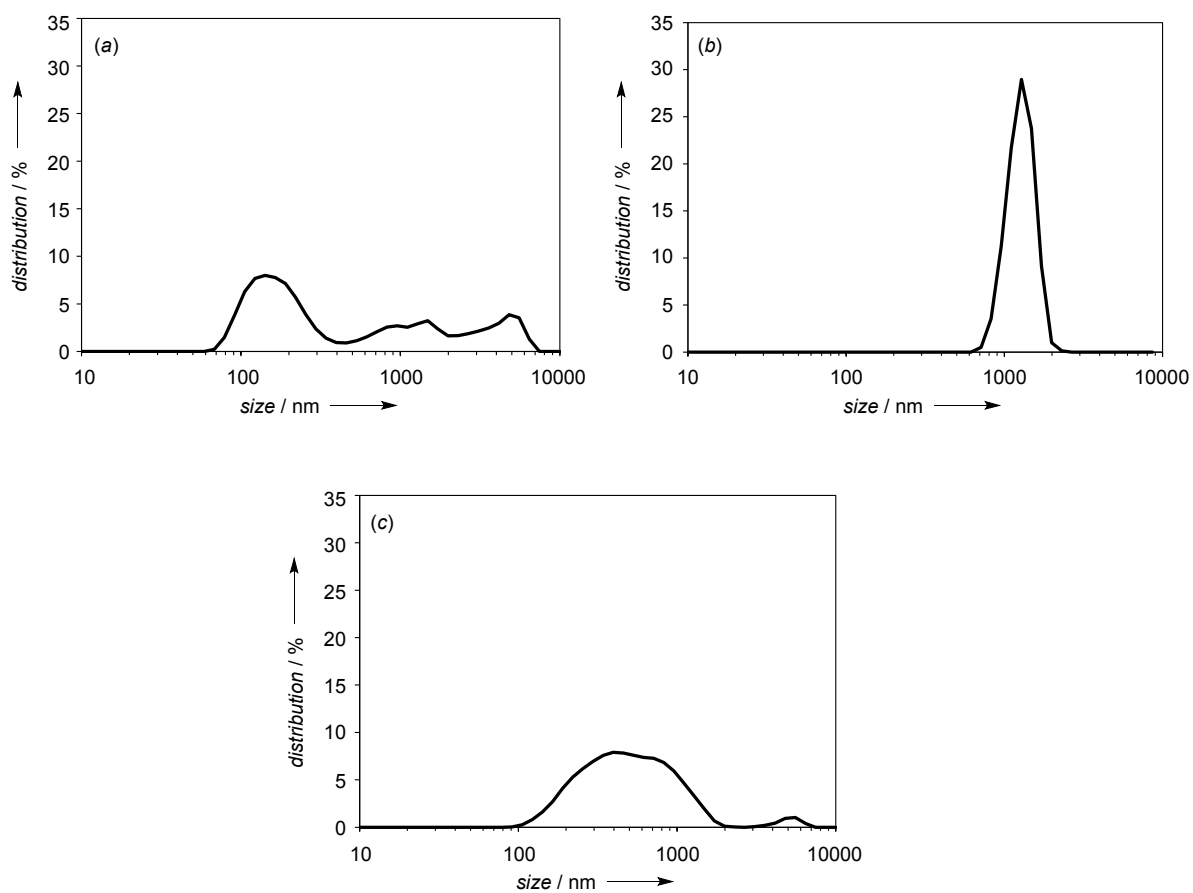

Supplement: c5py00162e1.pdf [file c5py00162e1.pdf]
